# Supplementary material for: Preparation of magnetic graphene composites with hierarchical structure for selective capture of phosphopeptides
Source: Royal Society of Chemistry journal article supplement (doi:10.1039/c4tb00509k), 2014-01-01
Supplement: c4tb00509k1.pdf [file c4tb00509k1.pdf]

## Supporting Information

### Figures:

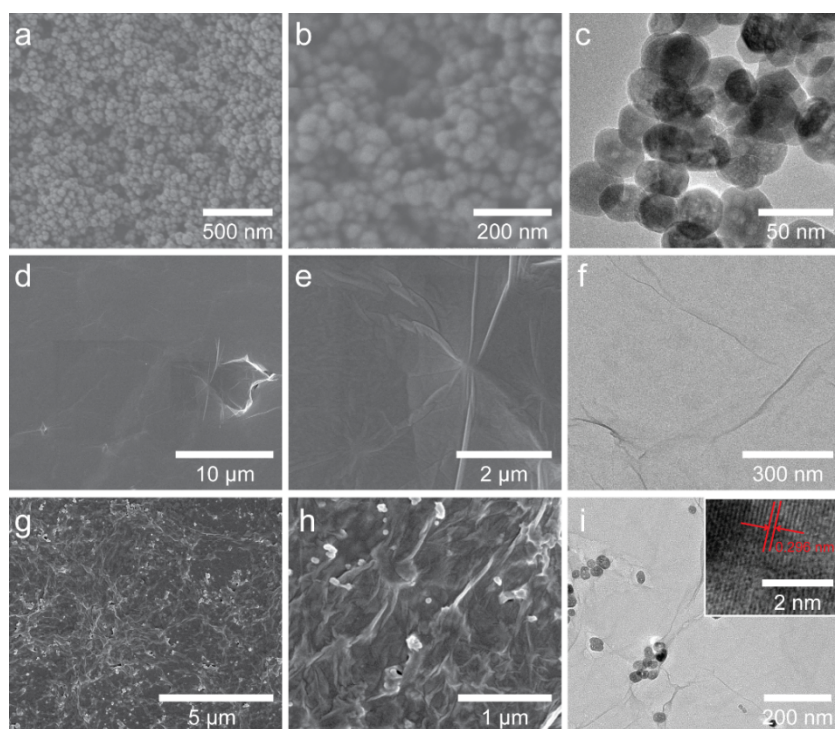

**Fig. S1** The SEM (a, b, d, e, g and h) and TEM (c, f, i) images of the  $\text{Fe}_3\text{O}_4$  (a-c), Graphene oxide (d-f) and magnetic graphene composites (denoted as MG) (g-i).

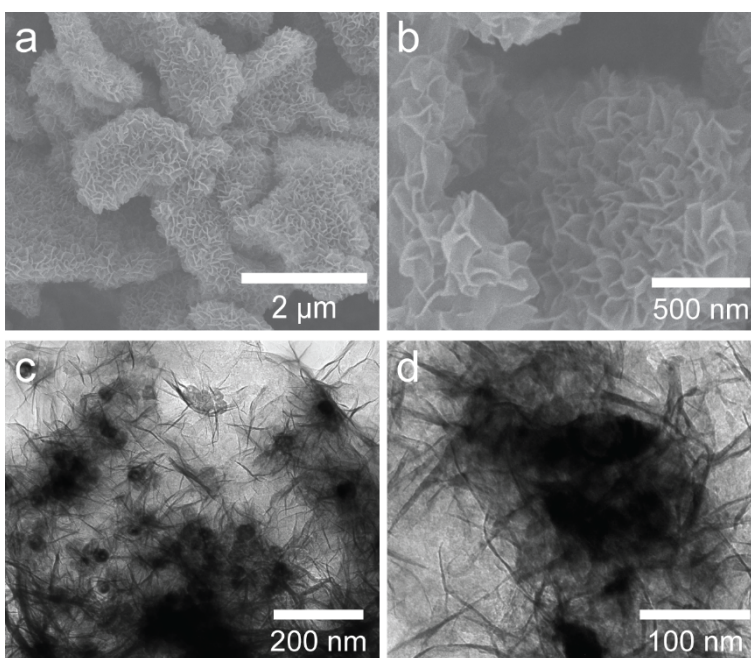

**Fig. S2** The SEM (a and b) and TEM (c and d) images of the MGTP precursor composites.

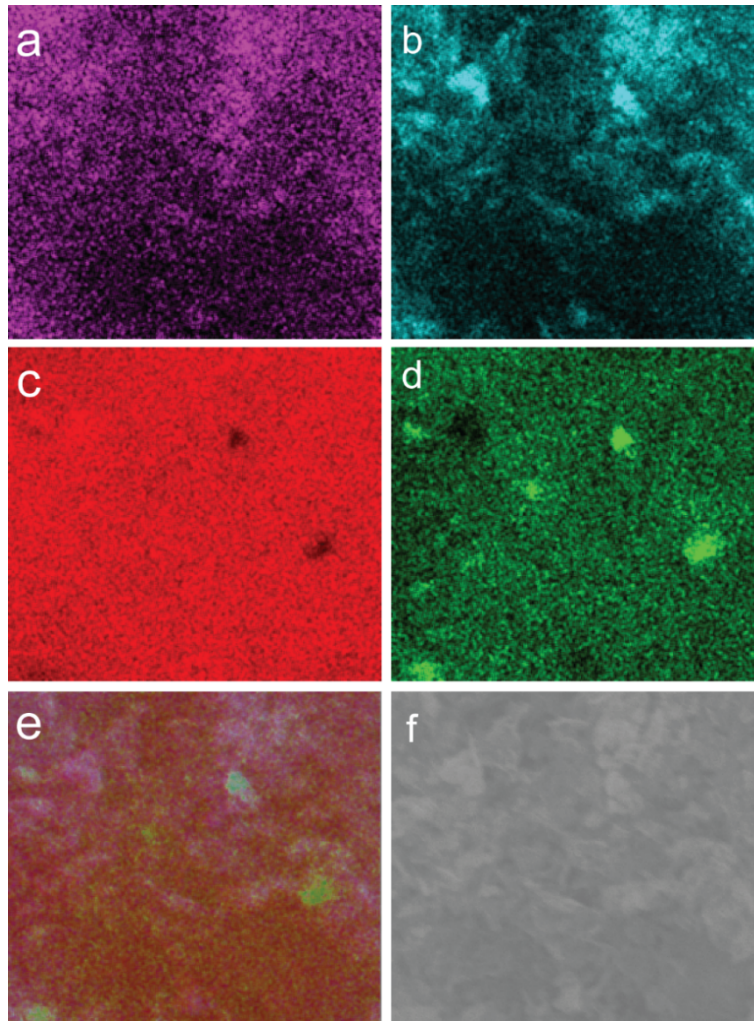

**Fig. S3** Elemental mapping analysis of the MGT composites: (a, b, c and d) elemental mapping of carbon, oxygen, titanium and ferrum, respectively, (e) the overlay of all the elemental mappings and (f) bright field of elemental mapping.

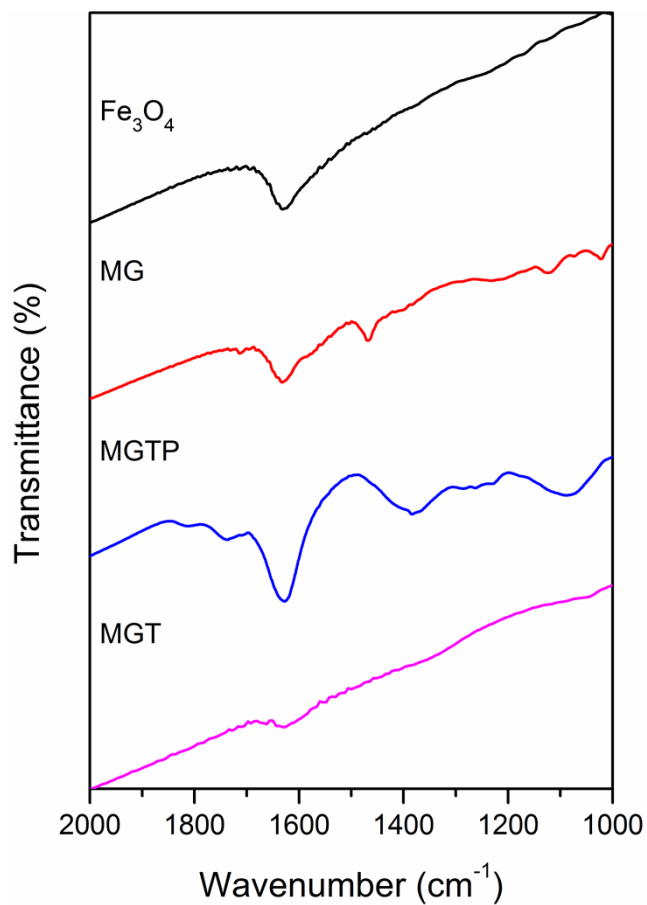

**Fig. S4** The enlarged FTIR spectra between 2000-1000 cm<sup>-1</sup> of the prepared Fe<sub>3</sub>O<sub>4</sub>, MG, MGTP and MGT composites.

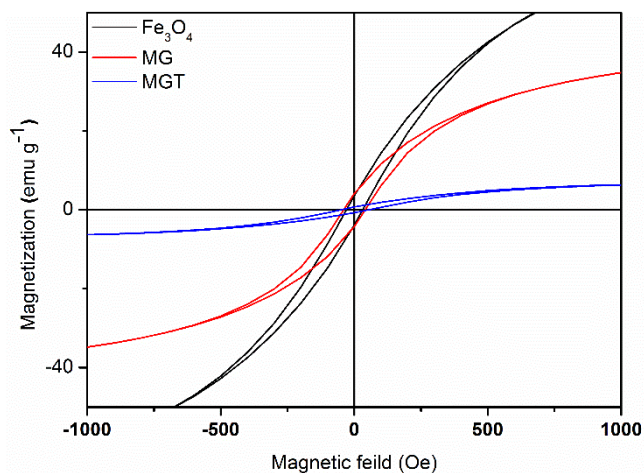

**Fig. S5** Zoomed in magnetic hysteresis curves of the Fe<sub>3</sub>O<sub>4</sub> nanoparticles, MG and the MGT composites at 300 K.

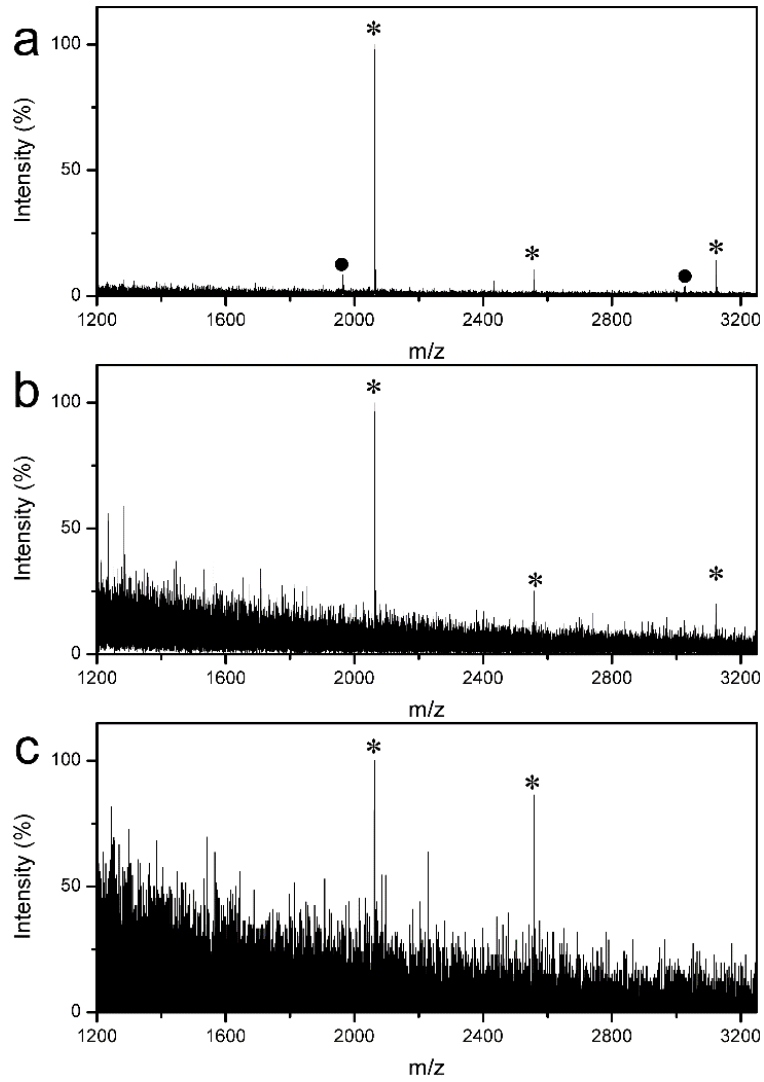

**Fig. S6** MALDI-TOF mass spectra of the tryptic digest of  $\beta$ -casein with different concentrations after enrichment with the MGT composites. (a)  $5 \times 10^{-9}$  M, (b)  $1 \times 10^{-9}$  M and (c)  $5 \times 10^{-10}$  M.

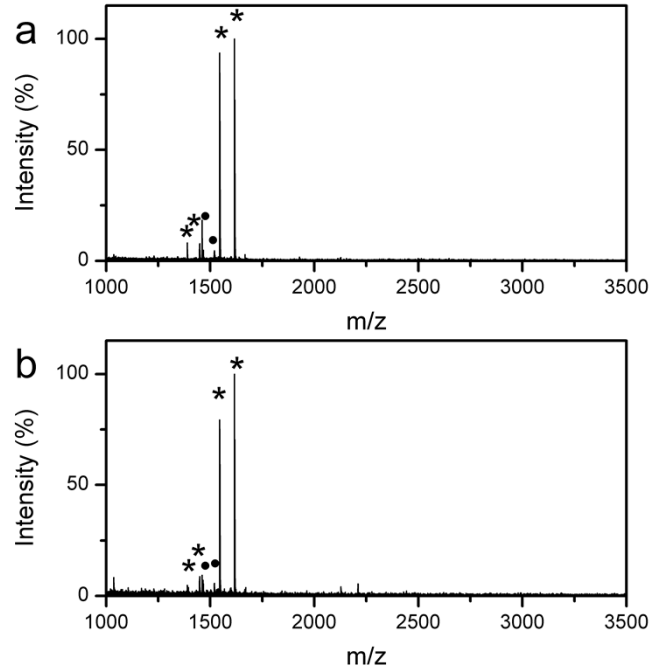

**Fig. S7** MALDI-TOF mass spectra of the same human serum sample after enrichment with third times (a) and fifth times (b) reused MGT composites.

**Tables:**

**Table S1.** The phosphopeptides enriched from tryptic digest of  $\beta$ -casein by the MGT composites.

| AA    | Peptide sequences                     | Theoretical m/z | Phosphorylation site |
|-------|---------------------------------------|-----------------|----------------------|
| 33-48 | FQ[pS]EEQQTEDELQDK                    | 2061.8          | 1                    |
| 33-52 | FQ[pS]EEQQTEDELQDKIHFP                | 2556.0          | 1                    |
| 1-25  | RELEELNVPGEIVE[pS]L[pS][pS][pS]EESITR | 3122.2          | 4                    |

**Table S2.** The phosphopeptides enriched from the human serum solution by the MGT composites.

| No. | Peptide sequences   | Observed m/z | Phosphorylation site |
|-----|---------------------|--------------|----------------------|
| 1   | D[pS]GEGDFLAEGGGV   | 1389.5       | 1                    |
| 2   | AD[pS]GEGDFLAEGGGV  | 1460.5       | 1                    |
| 3   | D[pS]GEGDFLAEGGGVR  | 1545.6       | 1                    |
| 4   | AD[pS]GEGDFLAEGGGVR | 1616.7       | 1                    |
